# Supplementary material
Source: publisher figshare collection journal article supplement (https://acs.figshare.com/ndownloader/files/3941305)
Supplement: Supplementary file 1 [file 3941305]

## Supplementary Information

### Galvanic Displaced Ultra-long $\text{Pb}_x\text{Se}_y\text{Ni}_z$ Hollow Nanofibers with High Thermopower

Miluo Zhang<sup>1</sup>, Jiwon Kim<sup>1</sup>, Seil Kim<sup>2</sup>, Hosik Park<sup>1</sup>, Hyunsung Jung<sup>3</sup>, N.George Ndifor-Angwafor<sup>1</sup>, Jaehong Lim<sup>4</sup>, Yongho Choa<sup>2,\*</sup> and Nosang V. Myung<sup>1,\*</sup>

<sup>1</sup>Department of Chemical and Environmental Engineering and Center for Nanoscale Science and Engineering, University of California-Riverside, Riverside, California 92521

<sup>2</sup>Department of Fine Chemical Engineering/Bionano Technology, Hanyang University, Ansan 426-791, Korea

<sup>3</sup>Advanced Materials Convergence Division, Korea Institute of Ceramic Engineering & Technology, Seoul 153-801, Republic of Korea

<sup>4</sup>Materials Processing Division, Korea Institute of Materials Science, 66 Sangnam-dong, Changwon, 641-010 Korea

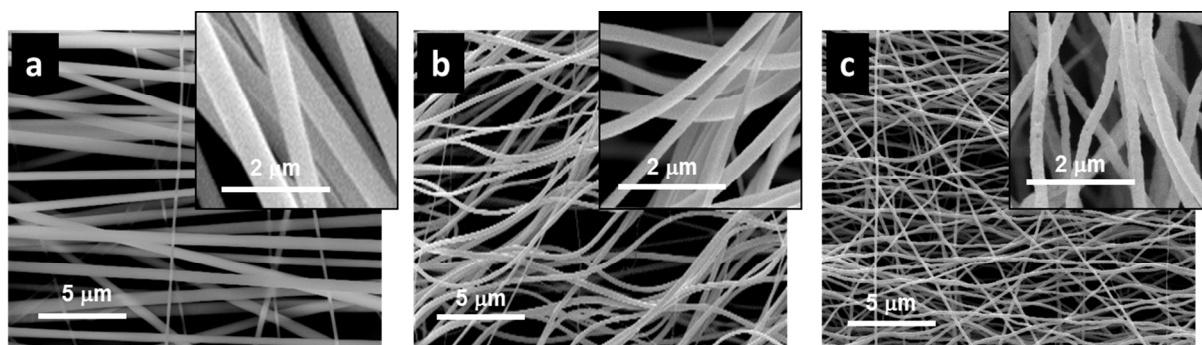

**Figure S1.** SEM images of (a) electrospun PVP/Ni acetate nanofibers, (b) NiO nanofibers, (c) Ni nanofibers.

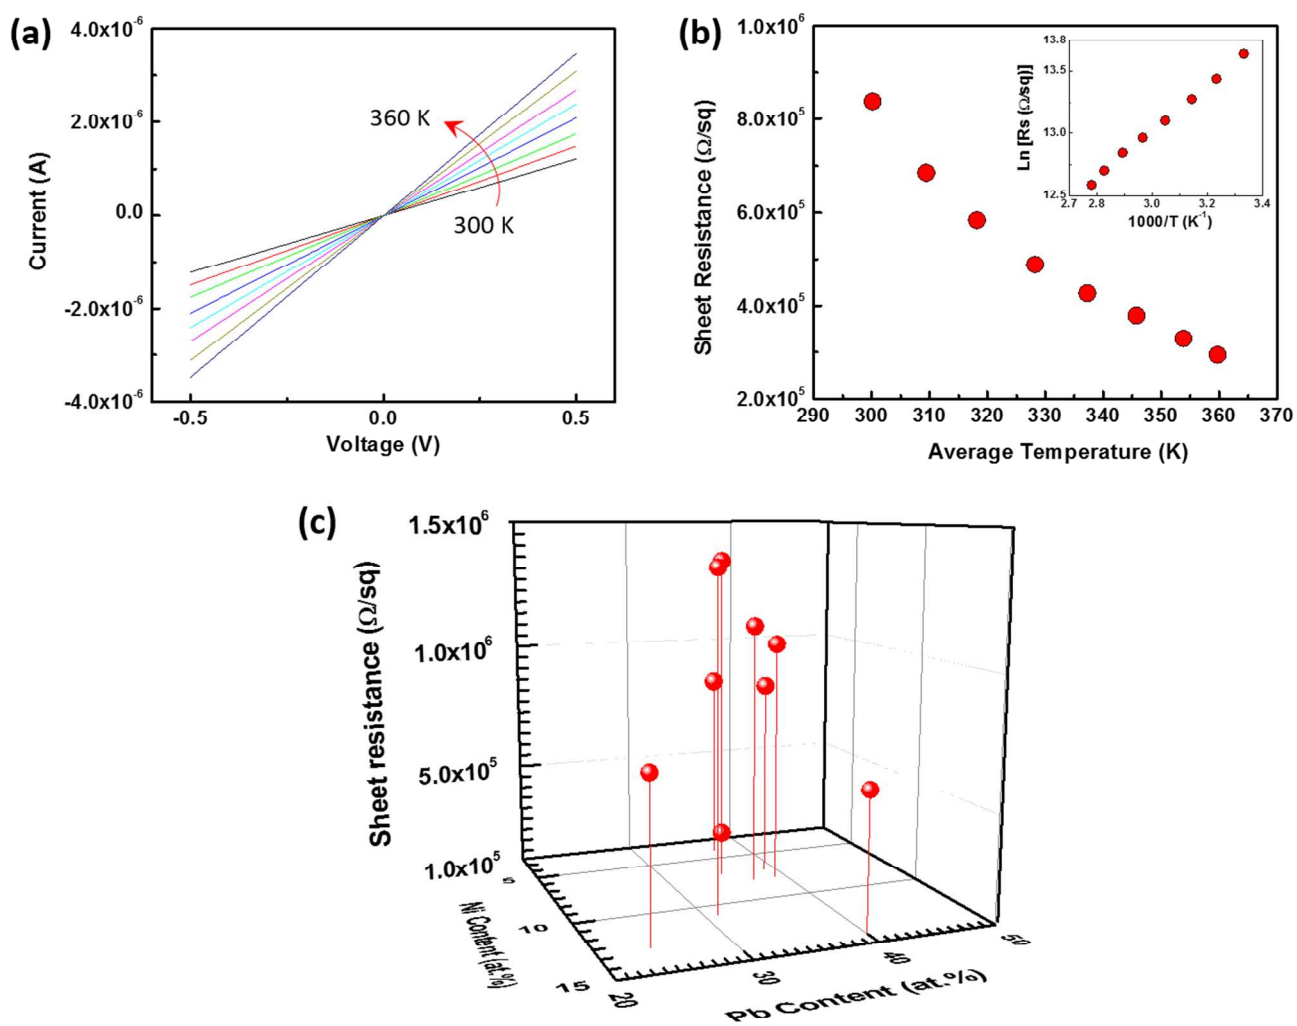

**Figure S2.** Temperature dependent (a) I-V characterization and (b) sheet resistance of  $\text{Pb}_{37}\text{Se}_{59}\text{Ni}_4$  NF mat. (c) 3D plot of Seebeck coefficient of  $\text{Pb}_x\text{Se}_y\text{Ni}_z$  nanofiber mat at 300 K as a function of Ni and Pb content.

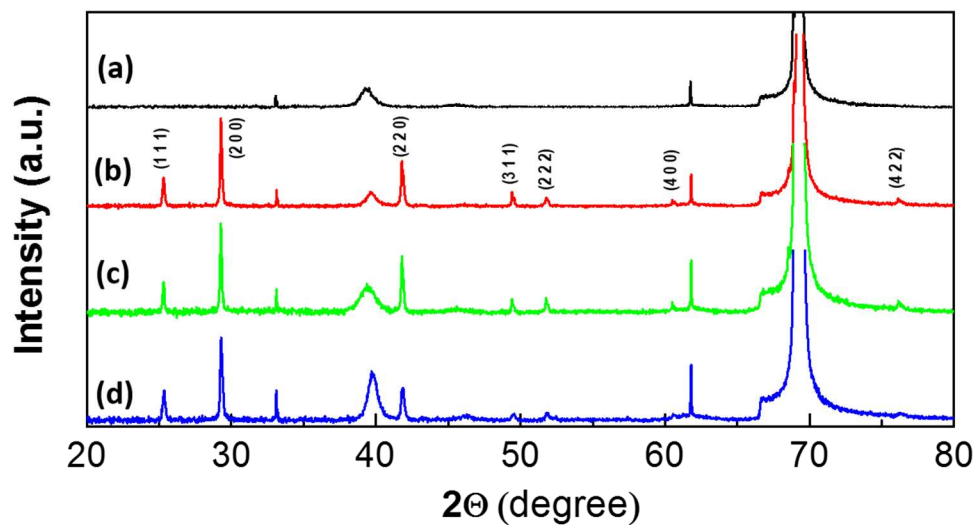

**Figure S3.** XRD pattern of (a) substrate, (b)  $\text{Pb}_{31}\text{Se}_{62}\text{Ni}_7$ , (c)  $\text{Pb}_{35}\text{Se}_{58}\text{Ni}_7$ , (d)  $\text{Pb}_{37}\text{Se}_{59}\text{Ni}_4$  hollow nanofiber mats. Substrate peaks are contributed from Si, Pt electrode and sample holder.

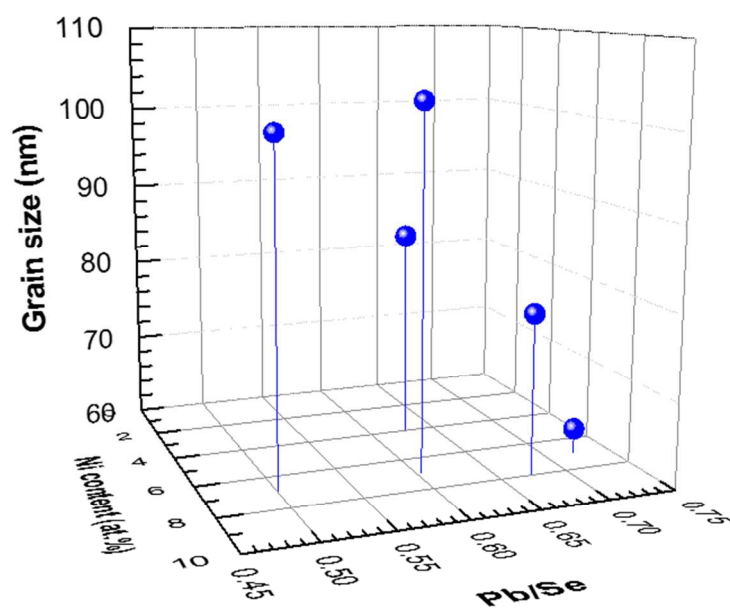

**Figure S4.** 3D plot of  $\text{Pb}_x\text{Se}_y\text{Ni}_z$  nanofiber mats' grain size as a function of Ni content and the ratio of Pb to Se content.

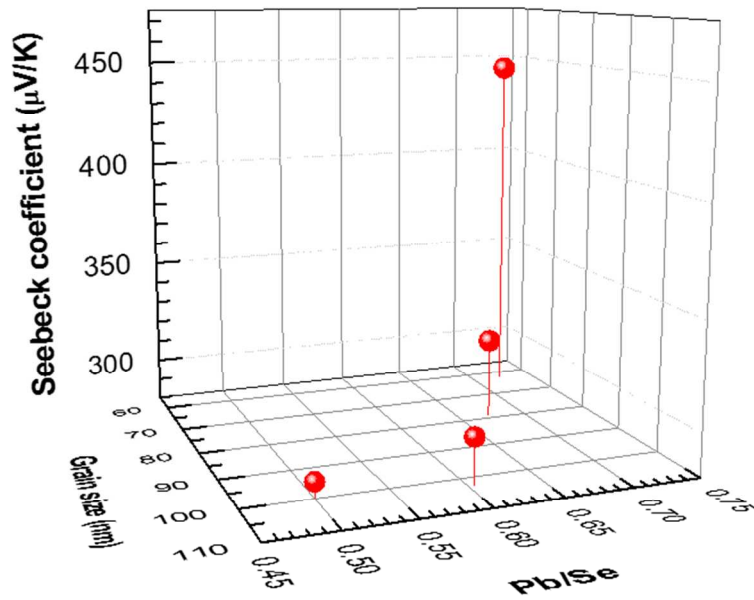

**Figure S5.** 3D plot of  $\text{Pb}_x\text{Se}_y\text{Ni}_z$  nanofiber mats' Seebeck coefficient at 300 K as a function of Ni content and the ratio of Pb to Se content.

#### Reference:

1. Jung, H.; Park, D. Y.; Xiao, F.; Lee, K. H.; Choa, Y. H.; Yoo, B.; Myung, N. V., Electrodeposited Single Crystalline PbTe Nanowires and Their Transport Properties. *J Phys Chem C* **2011**, *115* (7), 2993-2998.
2. Wang, H.; Pei, Y. Z.; LaLonde, A. D.; Snyder, G. J., Heavily Doped p-Type PbSe with High Thermoelectric Performance: An Alternative for PbTe. *Advanced Materials* **2011**, *23* (11), 1366-1370.
3. Kishimoto, K.; Koyanagi, T., Preparation of sintered degenerate n-type PbTe with a small grain size and its thermoelectric properties. *J Appl Phys* **2002**, *92* (5), 2544-2549.
